# Supplementary material for: Interaction Between Self-Perceived Disease Control and Self-Management Behaviors: The Role of Subjective Life Expectancy
Source: Research Square preprint supplement (doi:10.21203/rs.3.rs-827544/v1), 2021-10-05
Supplement: Supplementary file 1 [file 54bf74c1a6479d2e0763a24b.xls]

## Sheet: Sheet1
Table3 Pearson correlation test for Self-perceived disease control,subjective life expectancy and Self-management behaviors
	1	2	3	4	5	6	7	8	9	10	11	12	13	14	15	16	17	18	20	21	22
T1Subjective life expectancy	1
T2Subjective life expectancy	.578**	1
T3Subjective life expectancy	.485**	.518**	1
T1Self-perceived disease control	.164**	.214**	.150**	1
T2Self-perceived disease control	.155**	.233**	.285**	.248**	1
T3Self-perceived disease control	0.032	0.047	0.083	.235**	.267**	1
T1Tobacco avoidance	.154**	.105*	.156**	-0.003	0.043	0.006	1
T2Tobacco avoidance	.160**	.124**	.158**	0.031	0.027	0.028	.908**	1
T3Tobacco avoidance	.115**	.098*	.122**	-0.016	-0.007	0.04	.807**	.843**	1
T1Alcohol avoidance	-0.038	-0.051	0.012	0.077	0.031	0.007	.322**	.291**	.298**	1
T2Alcohol avoidance	-0.009	-0.039	0.023	0.005	-.087*	-0.009	.369**	.369**	.376**	.579**	1
T3Alcohol avoidance	0.008	-0.022	0.013	0.081	-0.046	0.034	.383**	.372**	.369**	.560**	.649**	1
T1Physical activity	.108*	.098*	0.029	0.002	.313**	0.061	.178**	.134**	.121**	0.064	0.058	.098*	1
T2Physical activity	.117**	.169**	.113*	0.075	0.048	0.054	.095*	.100*	0.082	-0.053	-0.011	0.014	.409**	1
T3Physical activity	.201**	.326**	.207**	.129**	.134**	0.056	.115**	.136**	.115**	-0.005	0.009	0.018	.371**	.599**	1
T1Self-monitoring	.152**	.140**	.144**	0.079	.256**	0.084	0.052	0.044	-0.004	0.063	-0.054	-0.026	.123**	0.026	0.084	1
T2Self-monitoring	0.084	0.02	-0.03	.159**	0	0.025	0.008	-0.005	-0.029	0.046	-0.079	-0.009	0.074	0.038	-0.018	.214**	1
T3Self-monitoring	0.067	.147**	.091*	.110*	0.004	0.011	0.046	0.042	0.036	0.069	0.019	0.038	.124**	.168**	.183**	.182**	.220**	1
T1Medication use	0.046	0.025	-0.013	-0.03	.187**	-0.009	.090*	.100*	0.084	0.031	0.041	.094*	0.065	-0.029	-0.017	.264**	.136**	0.003	1
T2Medication use	.147**	.137**	.113*	-0.023	-0.041	-0.009	.106*	.121**	0.078	0.044	0.032	0.017	0.048	0.022	0.063	.106*	.121**	.147**	.092*	1
T3Medication use	.357**	.615**	.308**	.103*	.288**	-0.056	.142**	.165**	.118**	-0.032	0.017	0.022	0.084	.130**	.208**	.136**	0.084	0.069	.232**	.202**	1
Note: * P<0.05; ** P<0.01; N=508.
