# Supplementary material for: Interaction Between Self-Perceived Disease Control and Self-Management Behaviors: The Role of Subjective Life Expectancy
Source: Research Square preprint supplement (doi:10.21203/rs.3.rs-827544/v1), 2021-10-05
Supplement: Supplementary file 2 [file 6a1c2fd691cf85dcf8c1ec4e.xls]

## Sheet: Sheet1
Supplementary Table 1. Fit index for Longitudinal cross-lagged models (Model 1-5) between self-perceived disease control and self-management behaviors
Model Fit	RMSEA	SRMR	χ2	df	χ2/df
Model1	0.047	0.025	164.993	78	2.12
Model2	0.039	0.022	138.476	78	1.78
Model3	0.05	0.026	175.184	78	2.25
Model4	0.032	0.018	118.29	78	1.52
Model5	0.038	0.019	133.936	78	1.72
Note: SLE = Subjective life expectancy
